# Supplementary material for: The rolB plant oncogene affects multiple signaling protein modules related to hormone signaling and plant defense
Source: PubMed Central journal article supplement (PMC5797197; doi:10.1038/s41598-018-20694-6), 2018-02-02

## SUPPLEMENTARY INFORMATION

# The *rolB* plant oncogene affects multiple signaling protein modules related to hormone signaling and plant defense

Victor P. Bulgakov<sup>1,2\*</sup>, Yulia V. Vereshchagina<sup>1</sup>, Dmitry V. Bulgakov<sup>1</sup>, Galina N. Veremeichik<sup>1</sup>, Yuri N. Shkryl<sup>1</sup>

<sup>1</sup> *Institute of Biology and Soil Science, Far Eastern Branch of the Russian Academy of Sciences, 159 Stoletija Str., Vladivostok, 690022, Russia*

<sup>2</sup> *Far Eastern Federal University, Vladivostok, 690950, Russia*

\* bulgakov@ibss.dvo.ru

## Contents

|                                                                                                                                                                                                                                                 |   |
|-------------------------------------------------------------------------------------------------------------------------------------------------------------------------------------------------------------------------------------------------|---|
| <b>Supplementary Table 1:</b> List of primer sequences used for qPCR analysis .....                                                                                                                                                             | 2 |
| <b>Supplementary Table 2:</b> Comparison of the strength of <i>rolB</i> expression in <i>rolB</i> -transformed <i>A. thaliana</i> callus lines transformed with the <i>rolB</i> gene expressed under the control of the 35S CaMV promoter ..... | 4 |
| <b>Supplementary Figure S1:</b> Typical 2-DE maps used in the present investigation .....                                                                                                                                                       | 4 |
| <b>Supplementary Figure S2:</b> Comparison of the protein expression level on 2D gels .....                                                                                                                                                     | 6 |
| Fig. S2-1: Heat shock 70 kDa protein 6, heat shock 70 kDa protein 7, chaperonin 60 subunit alpha 1, heat stress tolerant DWD 1 .....                                                                                                            | 6 |
| Fig. S2-2: Peptidyl-prolyl cis-trans isomerase ROC1 (CYP18-3, CP18C_ARATH) .....                                                                                                                                                                | 6 |
| Fig. S2-3: Receptor for activated C kinase 1A, RACK1A (GBLPA_ARATH) .....                                                                                                                                                                       | 7 |

**Supplementary Table 1: List of primer sequences used for qPCR analysis.**

| №  | UniProtKB code | Genbank accession number | Direct primers, (5'-3') | Reverse primers (5'-3'), |
|----|----------------|--------------------------|-------------------------|--------------------------|
| 1  | HSP7J_ARATH    | AY079015                 | TCCCAAGTATGCCACACCG     | GCTGGTTGCTCTGGCTCACTC    |
| 2  | HSP7O_ARATH    | AY079015                 | CTCATCCGCCTGCTCACCTC    | CTTCCCAAGTATGCCACACC     |
| 3  | HSP7P_ARATH    | AY065177                 | GAGGCAGCTGTGTCTAATG     | CTCTTGCCCTCATCCGCCTG     |
| 4  | HS902_ARATH    | AY128805                 | GAAGAAGAAAGAAGAGCTCAAG  | GAAACCAGAAGTGAGAAGAG     |
| 5  | TCPD_ARATH     | BT003418                 | CTATCGCCATTGTGACTGAACTC | GAAACTACCACACTACCTCACAG  |
| 6  | GBLPA_ARATH    | AY035007                 | CTCTTGGTGGCAGCAGGAC     | GTTGTTTTGCTGTGGGATTTG    |
| 7  | CP19C_ARATH    | AY072128                 | CTTTCACCGTATAATCCCAG    | CCTGTCAAGATCAACCCACCC    |
| 8  | CP20C_ARATH    | AF325026                 | CAATGCATCGGTCAATAGTG    | CTGGTGAGAAGAAATACGGG     |
| 9  | CP18C_ARATH    | AY093227                 | GGAACGGAACAGGCGGTGAG    | AAGAGACACCACAATGACGAC    |
| 10 | CP19B_ARATH    | BT025527                 | CACCGACAAGACACCAAAGACG  | CCACCTGACCAAACACCAC      |
| 11 | PNSL5_ARATH    | AY568517                 | CATTCCATCGTGTCATCAGAG   | CACTTCCATTCTTCTATTAC     |
| 12 | Q9XI87_ARATH   | BT026491                 | GTTGGAGACTTTGGACTTAG    | GATACATGTTTGGCTGCTTC     |
| 13 | HSP7F_ARATH    | AY072138                 | CAACCCAAGAAATCAAAGAC    | GTTTTCTCATTGGCTGTCTG     |
| 14 | HSP7G_ARATH    | BT000919                 | CAACTCAAGAAATCAAAGACAC  | CGTCAATCACATCACCGCCG     |
| 15 | HS905_ARATH    | AF436826                 | CTTCTCCTTGTGTGCTTGTC    | CTTGTTGCTTCAGTGCTCTC     |
| 16 | CPNA1_ARATH    | BT002441                 | CATTTGCTGCTATCGAGGAAG   | CGCACATCTTGTCACCTTAGC    |

|    |             |              |                          |                            |
|----|-------------|--------------|--------------------------|----------------------------|
| 17 | CH10C_ARATH | AJ010818     | CCGAGACTACCAAAGAGAAG     | CTAAGAAAGTATAGCCATCAC      |
| 18 | ACT2_ARATH  | NM_001338359 | ACTTTCATCAGCCGTTTTGA     | ACGATTGGTTGAATATCATCAG     |
| 19 | UBQ10_ARATH | NM_178968    | GGCCTTGTATAATCCCTGATGAAT | AAAGAGATAACAGGAACGGAAACATA |

**Supplementary Table 2: Comparison of the strength of *rolB* expression in *rolB*-transformed *A. thaliana* callus lines transformed with the *rolB* gene expressed under the control of the 35S CaMV promoter**

| <i>A. thaliana</i> callus lines                |                                                  |
|------------------------------------------------|--------------------------------------------------|
| At (control callus culture)                    | -                                                |
| AtB1( <i>rolB</i> -transformed callus culture) | 0.221 ± 0.006 <sup>A</sup>                       |
| AtB2( <i>rolB</i> -transformed callus culture) | 0.561 ± 0.041 <sup>B</sup> selected for analysis |

Quantitative real-time PCR (qPCR) analysis. RNA samples were isolated from callus cultures (20–22 d) of *A. thaliana*. The data are presented as mean ± standard error from three biological replicates with two technical replicates for each experiment. Different letters (superscript) indicate statistically significant differences of means ( $p < 0.05$ ), Fisher's LSD. Dashes indicate the absence of expression.

**Supplementary Figure S1: Typical 2-DE maps used in the present investigation**

**A, C, E:** vector-transformed callus cultures of *A. thaliana* and **B, D, F:** *rolB*-transformed callus cultures. 500 micrograms of protein was applied to 18 cm long IPG strips (nonlinear pH gradient, pH 3-10), 12% SDS-PAGE gels were used in the second dimension. Coomassie brilliant blue G-250 staining was used for protein detection. Red squares represent the areas shown in greater detail in Supplementary Figure S2.

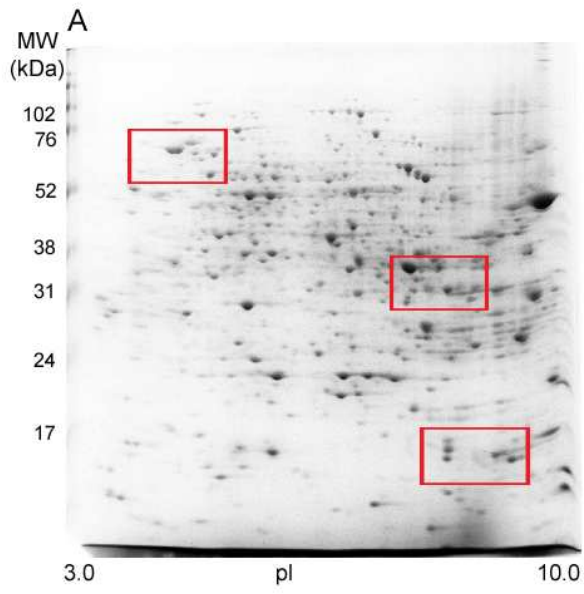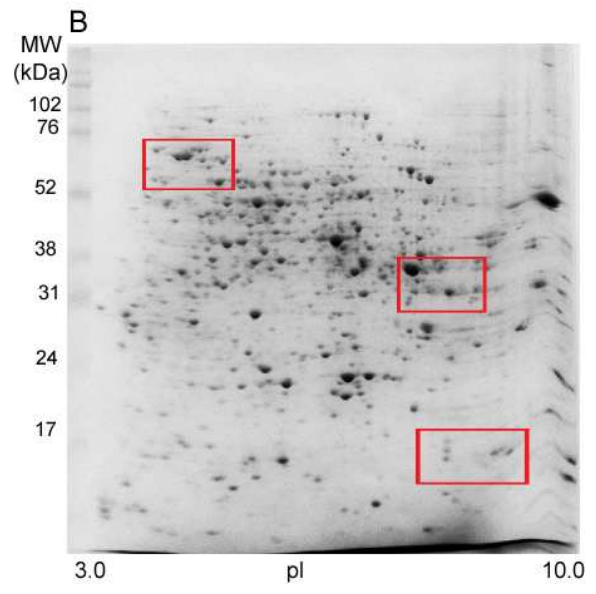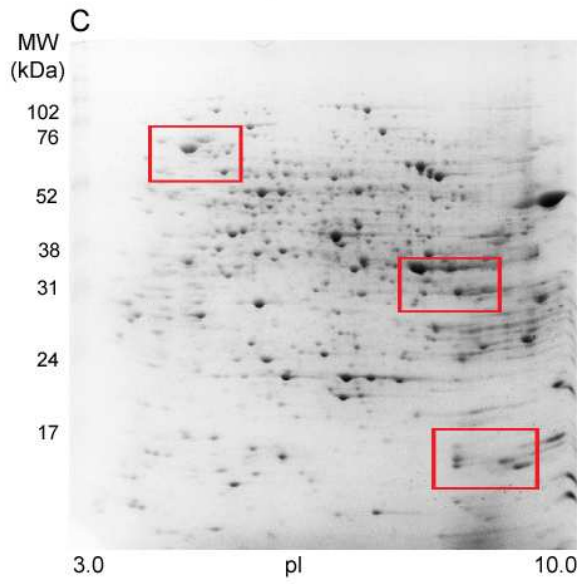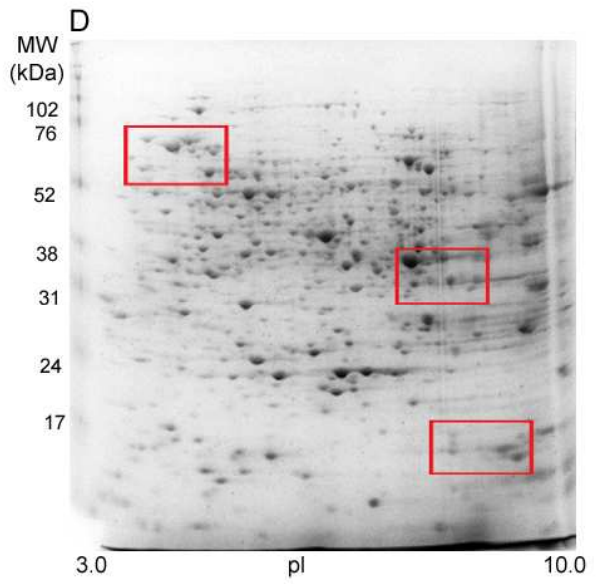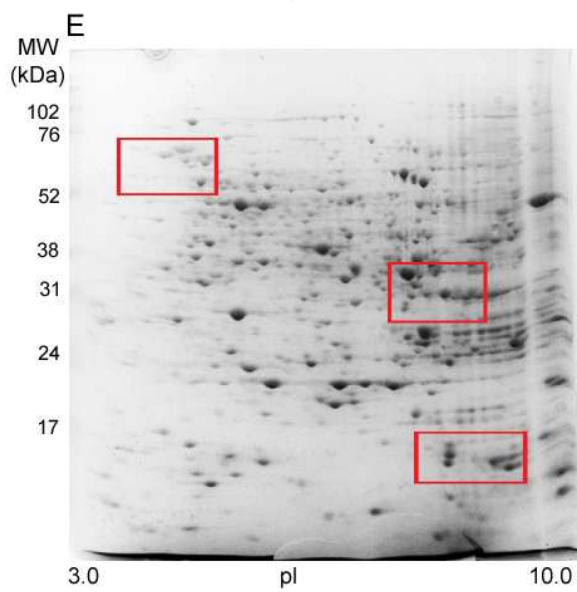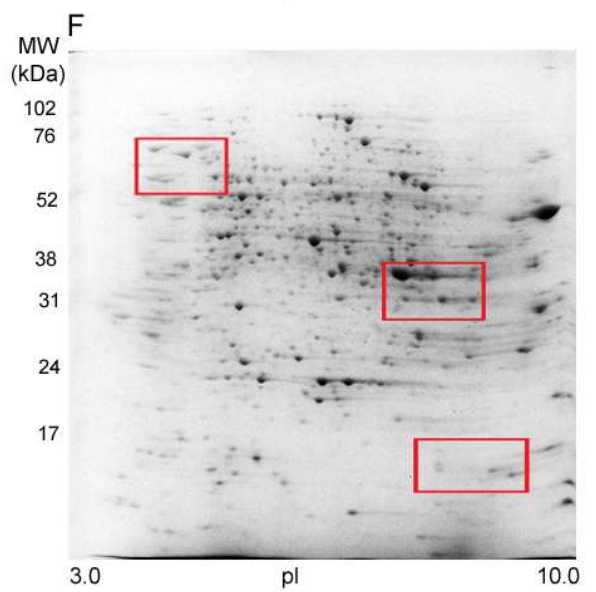

## Supplementary Figure S2: Comparison of the protein expression level on 2D gels

Gels were scanned using the PharosFX Plus System. PDQuest 8.0.1 Advanced software (Bio-Rad) was used for analysis of protein spots. Three control and three experimental gels were used in the analysis.

**Fig. S2-1:** Heat shock 70 kDa protein 6, heat shock 70 kDa protein 7, chaperonin 60 subunit alpha 1, heat stress tolerant DWD 1.

**A**, control calli; **B**, *rolB*-transformed calli of *A. thaliana*.

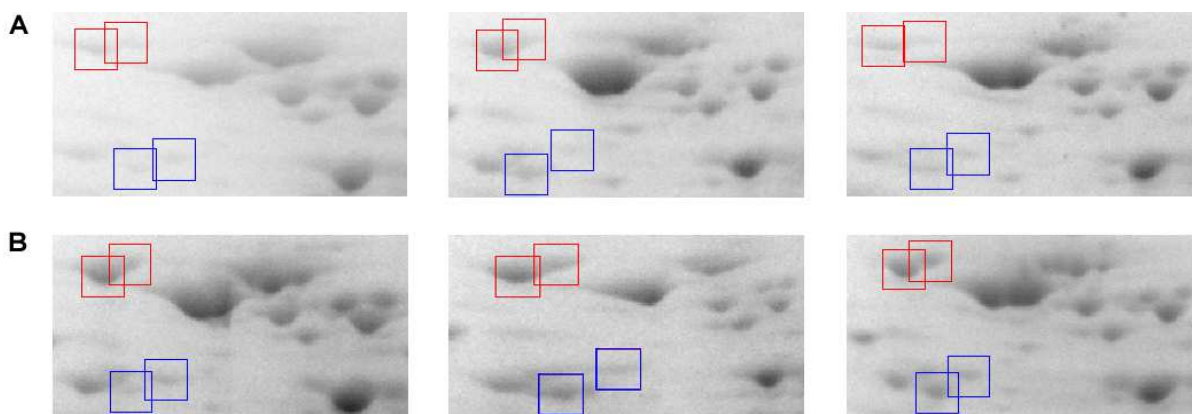

Red square on the left: heat shock 70 kDa protein 6, chloroplastic (HSP7F\_ARATH).

Red square on the right: heat shock 70 kDa protein 7, chloroplastic (HSP7G\_ARATH).

Blue square on the left: chaperonin 60 subunit alpha 1, chloroplastic, Cpn60 (CPNA1\_ARATH).

Blue square on the right: heat stress tolerant DWD 1. Synonym: HTD1/WD-40 repeat family protein (Q9ZUN8\_ARATH).

**Fig. S2-2:** Peptidyl-prolyl cis-trans isomerase ROC1 (CYP18-3, CP18C\_ARATH).

**A**, control calli; **B**, *rolB*-transformed calli of *A. thaliana*

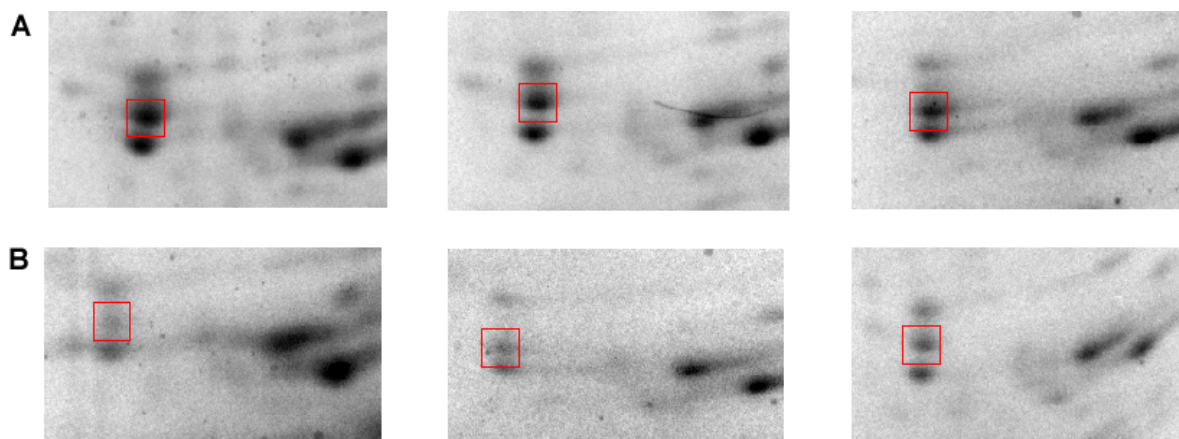

**Fig. S2-3:** Receptor for activated C kinase 1A, RACK1A (GBLPA\_ARATH).

**A**, control calli; **B**, *rolB*-transformed calli of *A. thaliana*

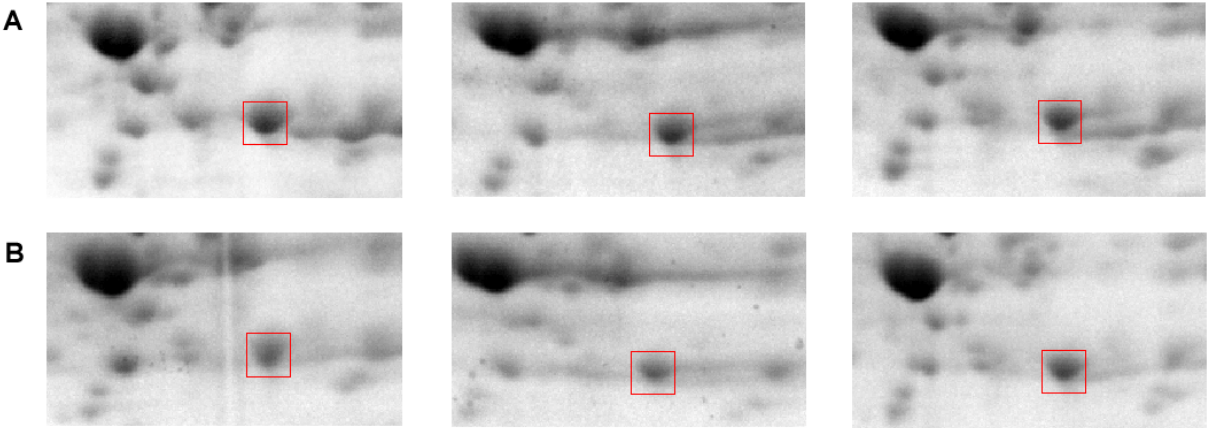

Supplement: 41598_2018_20694_MOESM4_ESM.pdf [file 41598_2018_20694_MOESM4_ESM.pdf]
